# Supplementary material
Source: publisher figshare collection journal article supplement (https://acs.figshare.com/ndownloader/files/5174203)
Supplement: Supplementary file 1 [file 5174203]

**Supporting Information:**

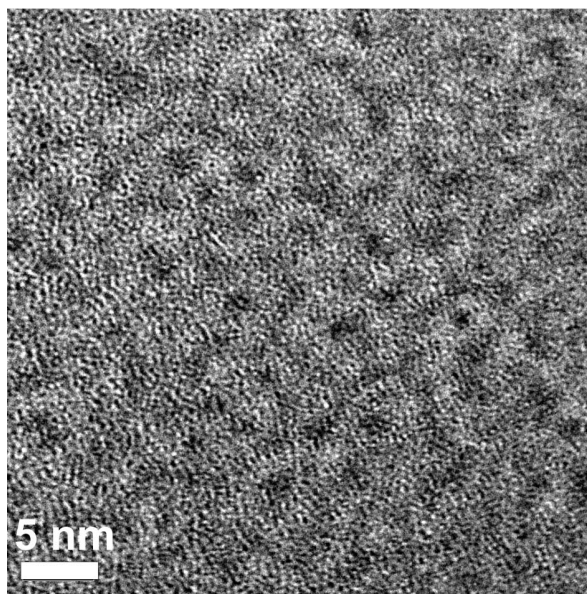

SFigure 1. TEM image of the nanoparticles synthesized with oleic acid alone

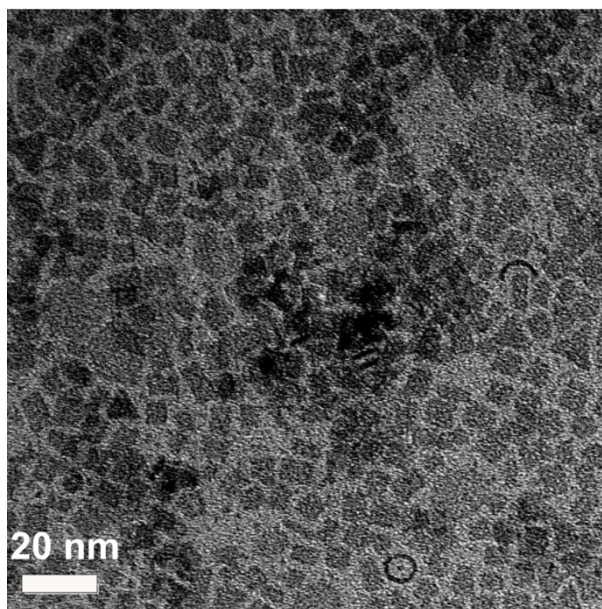

SFigure 2. TEM image of the nanoparticles synthesized with oleic acid and oleyamine
